# Supplementary material for: Energetic contribution to hydration shells in one-dimensional aqueous electrolyte solution by anomalous hydrogen bonds
Source: Royal Society of Chemistry journal article supplement (doi:10.1039/c3cp44671a), 2013-01-01
Supplement: c3cp44671a.pdf [file c3cp44671a.pdf]

**Electronic Supporting Information for**

**Energetic Contribution to Hydration Shell in One-Dimensional  
Aqueous Electrolyte Solution by Anomalous Hydrogen Bonds**

*Tomonori Ohba<sup>\*</sup> and Hirofumi Kanoh*

\*To whom correspondence should be addressed

E-mail: ohba@pchem2.s.chiba-u.ac.jp

This PDF file includes:

**Potential Model**

**Table S1** Molecular numbers and densities.

**Figure S1** Potential profiles.

**Figure S2** Effective diameters

**Figure S3** Radial distribution functions

## Potential Model

**TIP5P model:** The site–site potential used here is as follows:

$$\Phi_{ij} = \sum 4 \varepsilon_{ij} [ (\sigma_{ij}/r_{ij})^{12} - (\sigma_{ij}/r_{ij})^6 ] + (1/4\pi\varepsilon_0) q_i q_j / r_{ij} \quad (1)$$

where  $\varepsilon_{ij}$  and  $\sigma_{ij}$  are the potential well depth and collision diameter, and  $r_{ij}$  is the distance between sites. The coulombic interaction term is described by the point charges at sites.

**Table S1** Molecular numbers of  $\text{Na}^+$ ,  $\text{Cl}^-$ , and water and densities in CNTs of diameter  $D = 0.7\text{--}2.0$  nm

| $D / \text{nm}$        | 0.7 | 0.8 | 0.9  | 1.0  | 1.2  | 1.5  | 2.0  |
|------------------------|-----|-----|------|------|------|------|------|
| $\text{Na}^+$          | 2   | 2   | 2    | 2    | 4    | 7    | 15   |
| $\text{Cl}^-$          | 2   | 2   | 2    | 2    | 4    | 7    | 15   |
| Water                  | 31  | 31  | 31   | 62   | 147  | 326  | 730  |
| $d / \text{kg L}^{-1}$ | -   | -   | 0.37 | 0.70 | 0.82 | 0.93 | 1.01 |

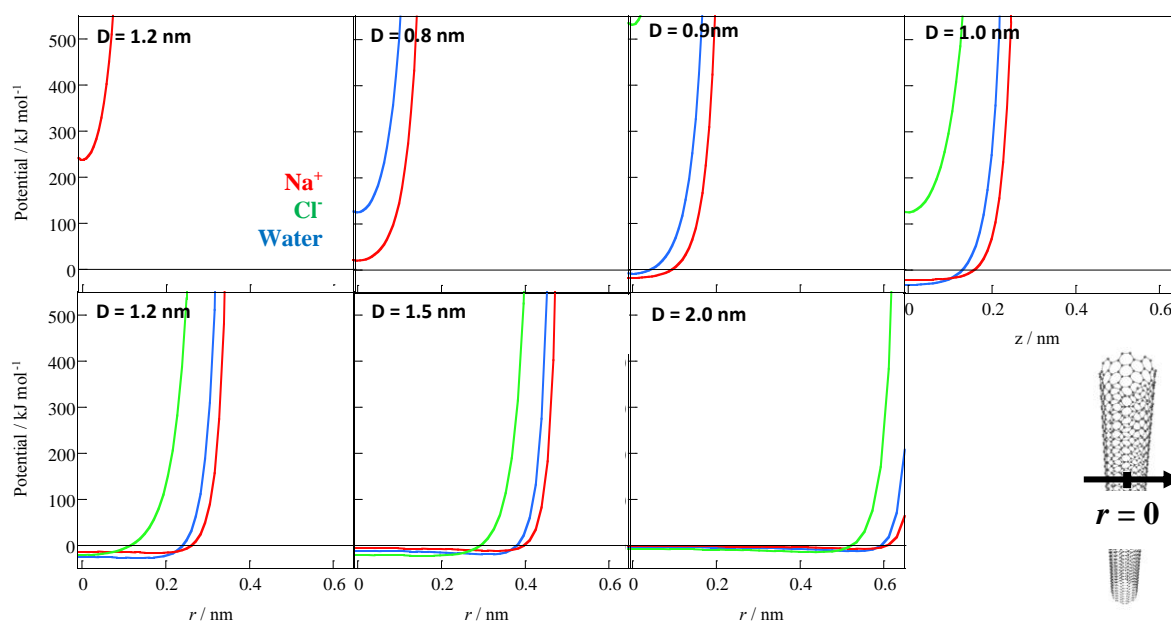

**Figure S1.** Potential profiles of  $\text{Na}^+$ ,  $\text{Cl}^-$ , and water molecules in CNTs of diameters 0.7–2.0 nm.

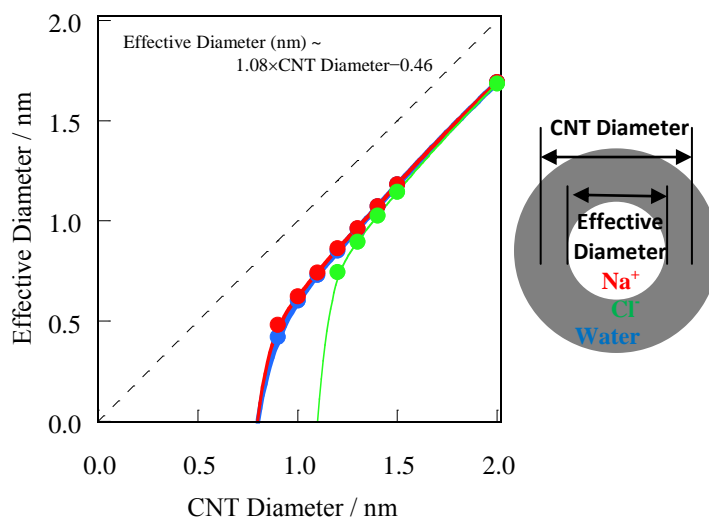

**Figure S2.** Effective diameters of Na<sup>+</sup>, Cl<sup>-</sup>, and water molecules as function of CNT diameter.

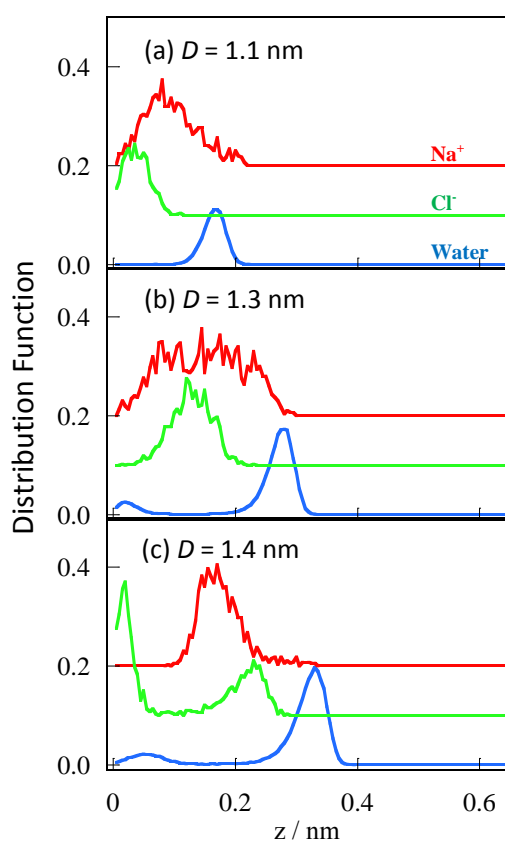

**Figure S3.** Distributions of Na<sup>+</sup>, Cl<sup>-</sup>, and water molecules against a CNT axis for CNT diameters of  $D = 1.1$  (a),  $1.3$  (b), and  $1.4$  nm (c).

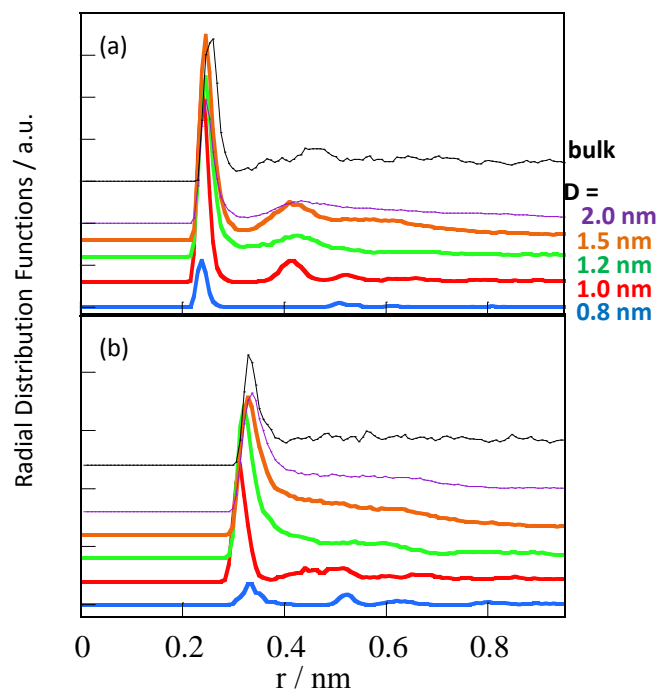

**Figure S4.** Radial distribution functions of water from (a) Na<sup>+</sup> and (b) Cl<sup>-</sup> ions for CNTs of diameter 0.8–2.0 nm.

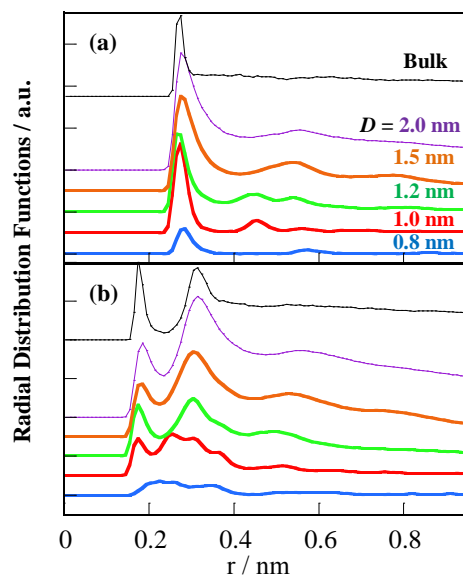

**Figure S5.** Radial distribution functions between (a) O–O and (b) O–H of water molecules in CNTs of diameters  $D = 0.8$ – $2.0$  nm.
